# Supplementary material for: Charge-transfer electronic states in organic solar cells: a TDDFT study
Source: Royal Society of Chemistry journal article supplement (doi:10.1039/d1cp00723h), 2021-01-01
Supplement: d1cp00723h1.pdf [file d1cp00723h1.pdf]

## Charge-transfer electronic states in organic solar cells: A TDDFT study

Andrés F. Marmolejo-Valencia, Zaahel Mata-Pinzón Carlos Amador-Bedolla

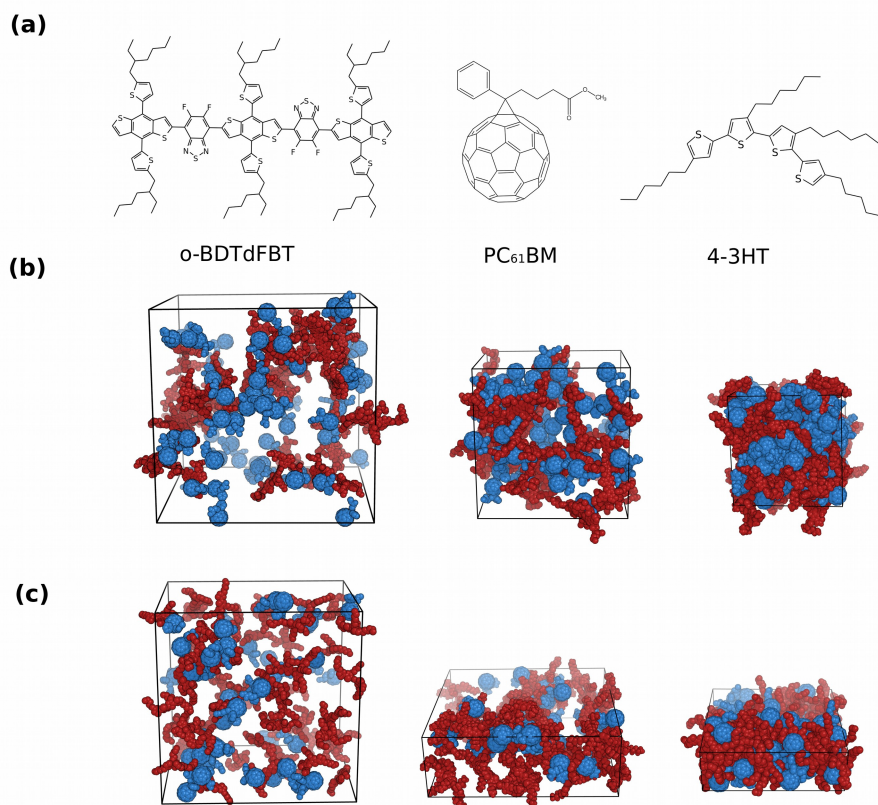

**Figure S1.** (a) Structures of electron acceptor PCBM ([6,6]-phenyl-C<sub>61</sub>-butyric acid methyl ester), donor molecules 4-3HT and o-BDTdFBT. (b) Solvent evaporation simulation for o-BDTdFBT/PC<sub>61</sub>BM and (c) 4-3HT/PC<sub>61</sub>BM.

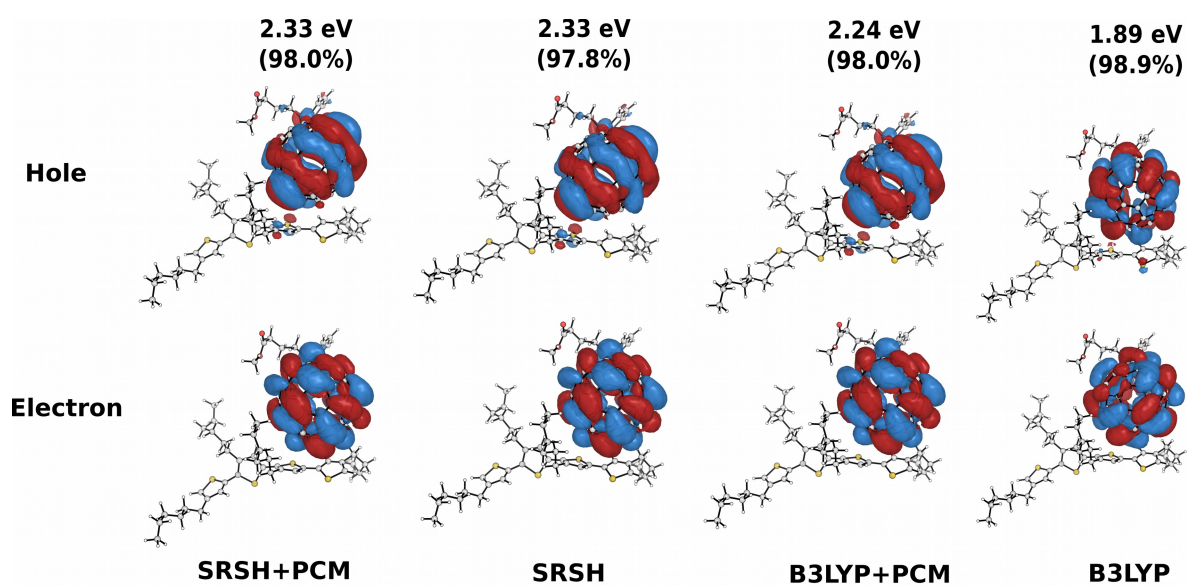

**Figure S2.** Electron-hole pair localization of the locally excited state LE computed from NTO, in the selected eD-eA adduct 4-3HT/PC<sub>61</sub>BM, showing dependency for each scheme.

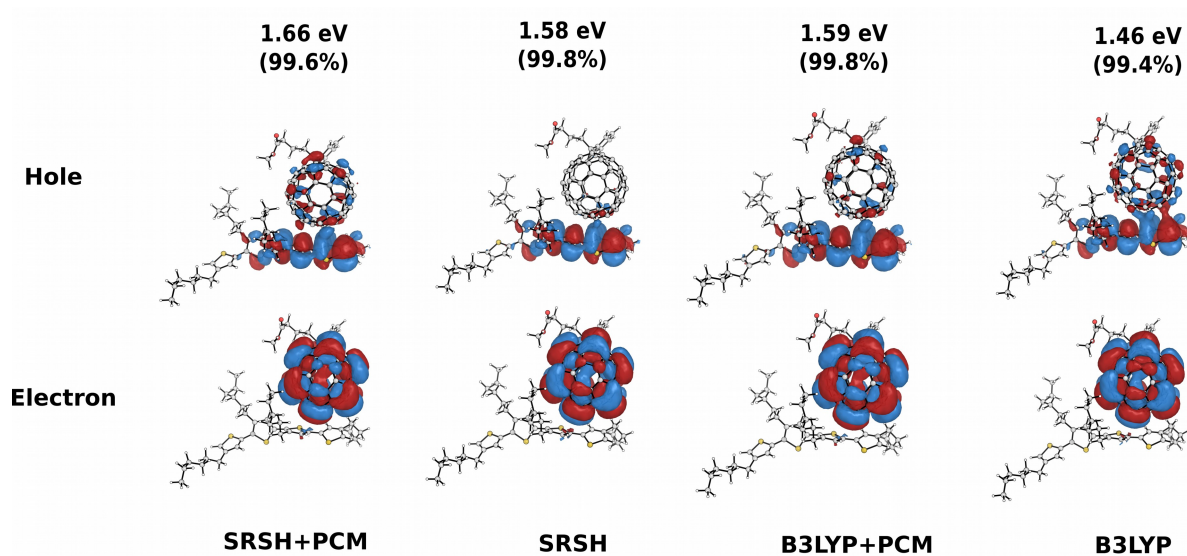

**Figure S3.** Electron-hole pair localization of charge transfer states CT<sub>1</sub> (CT<sub>2</sub>) computed from natural transition orbital calculation (NTO) for one eD-eA adduct 4-3HT/PC<sub>61</sub>BM using different schemes. Curiously, the lowest charge transfer state CT<sub>1</sub> is equal to the charge transfer state most coupled (CT<sub>2</sub>) to the locally excited state LE.

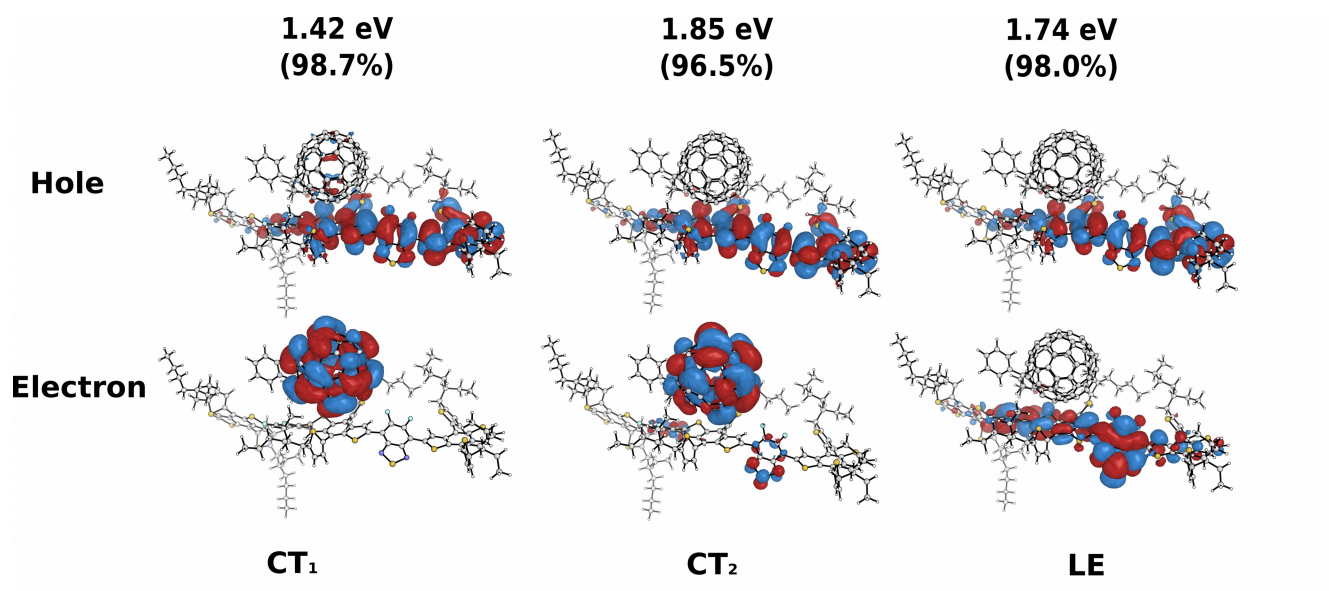

**Figure S4.** Electron-hole pairs computed for each electronic excited states in one adduct o-BDTdFBT/PC<sub>61</sub>BM using B3LYP scheme and NTO implementation.

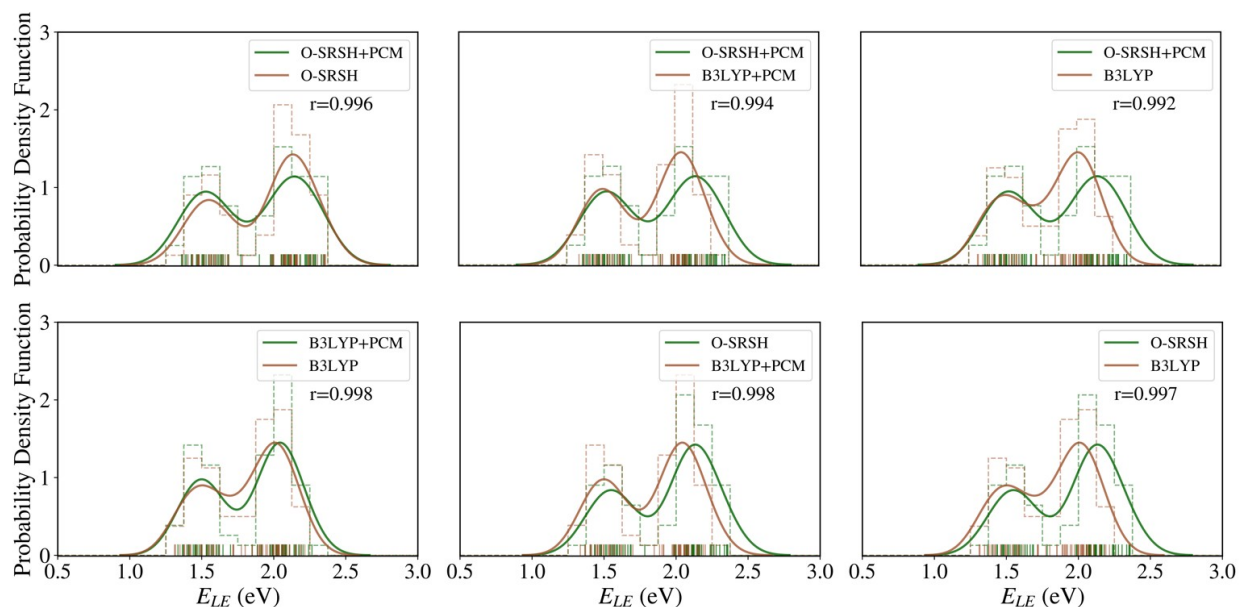

**Figure S5.** Probability density function of LE state schemes for 4-3HT/PC<sub>61</sub>BM system using O-SRSH+PCM, O-SRSH, B3LYP+PCM and B3LYP schemes. Pearson correlation coefficient  $r$  between schemes was evaluated with kernel density stimulation values.

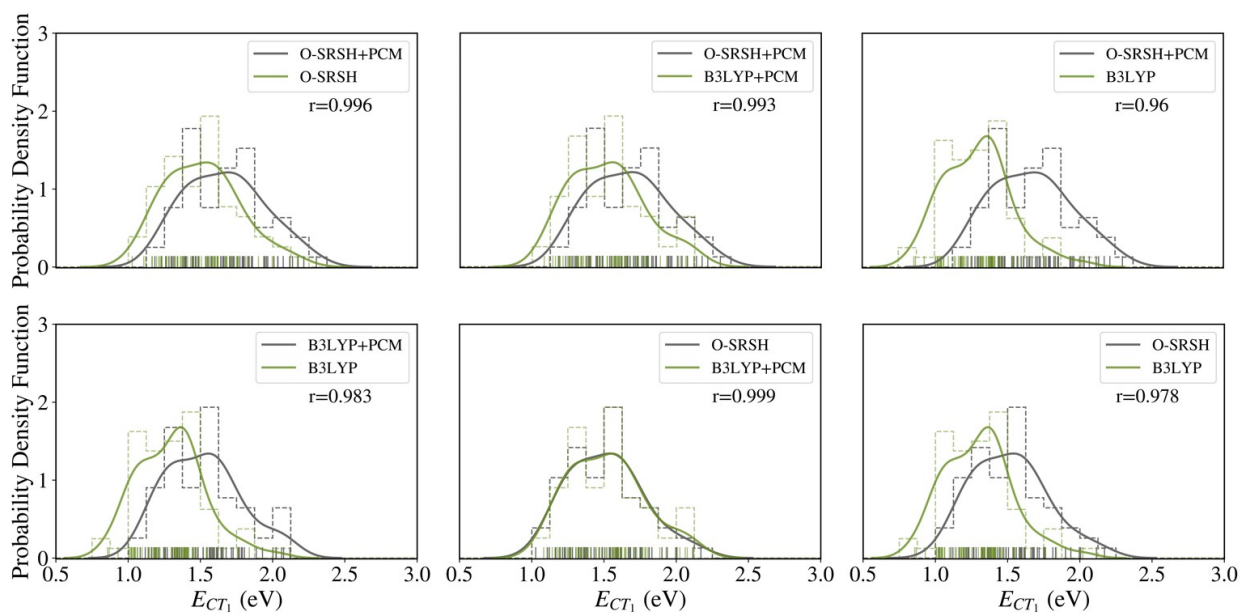

**Figure S6.** Probability density function of CT<sub>1</sub> state calculated from O-SRSH+PCM, O-SRSH, B3LYP+PCM and B3LYP schemes schemes in the 4-3HT/PC<sub>61</sub>BM system. Pearson correlation coefficient  $r$  between schemes was computed with kernel density stimulation values.

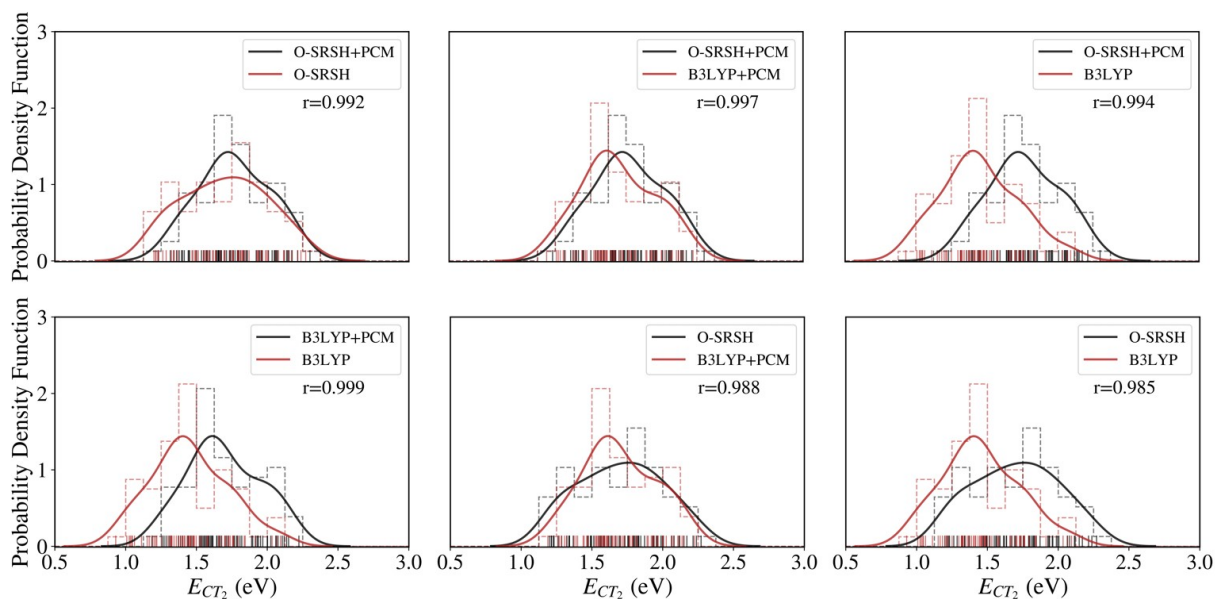

**Figure S7.** Probability density function of CT<sub>2</sub> state schemes for 4-3HT/PC<sub>61</sub>BM system using O-SRSH+PCM, O-SRSH, B3LYP+PCM and B3LYP schemes. Pearson correlation coefficient  $r$  between schemes was computed with kernel density estimation values.

**Table S1.** Charge difference relation  $\delta$  calculated between two states that are involved in charge transfer processes.

|           | $\delta = \frac{1}{2}  Q_{ii}^{DA} + Q_{jj}^{DA} $ |                     |                    |
|-----------|----------------------------------------------------|---------------------|--------------------|
|           | LE-CT <sub>1</sub>                                 | CT <sub>1</sub> -GS | LE-CT <sub>2</sub> |
|           | 4-3HT/PC <sub>61</sub> BM                          |                     |                    |
| SRSH+PCM  | 0.90±0.09                                          | 0.88±0.10           | 0.90±0.09          |
| SRSH      | 0.92±0.08                                          | 0.88±0.07           | 0.91±0.06          |
| B3LYP+PCM | 0.89±0.09                                          | 0.86±0.10           | 0.88±0.09          |
| B3LYP     | 0.91±0.11                                          | 0.85±0.10           | 0.91±0.10          |
|           | o-BDTdFBT/PC <sub>61</sub> BM                      |                     |                    |
| B3LYP     | 0.94±0.07                                          | 0.90±0.04           | 0.93±0.07          |

Where  $Q_{ii}^{DA} = Q_i^D - Q_i^A$  represents the charge difference between donor-fragment and acceptor-fragment charges in the state  $i$ .
